# Supplementary material for: COVID-19 lockdown disrupts support networks integral to maintaining foot health: a mixed-methods study
Source: J Foot Ankle Res. 2021 Jun 30;14:46. doi: 10.1186/s13047-021-00486-4 (PMC8243073; doi:10.1186/s13047-021-00486-4)
Supplement: Supplementary file 1 — Additional file 1. Qualitative themes, subthemes, and codes. [file 13047_2021_486_MOESM1_ESM.xlsx]

## Sheet: V1
Question	Theme	Subtheme	Analysis comment	Quotation
Q1. What foot pain or problems do participants describe?	1.1 Musculoskeletal	1.1.1 Swelling	Swelling is described as occuring across the foot although in the majority of cases particularly affects the ankle. Swelling is frequently linked with pain statements. The term 'deformity' is almost exclusively used by participants to describe changes in shape or appearance of the foot, toes or ankles. Other reference is made to 'lumps', 'bumps', 'misshapen'. The majority of injuriry reported was…	"My ankles are more swollen and painful than usual"
		1.1.2 Deformity		"I have deformed toes and feet"
		1.1.3 Injury		"plantarfasciitis"; "Achilles tendonitis"; "I have been diagnosed during lockdown with gout in my big toe and smaller toe affected now too"; "I have had foot pain for over a year caused by an injury (likely stress fracture/ligament damage) that causes aggravation to mid-foot during exercise/walking. Too much aggravation leads to me not being able to walk on that foot without limping. I have not b…
		1.1.4 Physical activity		"tends to be difficult to walk on it after resting, despite tendon stretching exercises"; "Reduced exercise has caused extra pain"; "an old karate accident, but it is hurting more often now I am doing karate more often"; "I have developed a pain in my ankle and heal which limits my ability to walk comfortably since late April. Worse after a period of inactivity"; "Too much aggravation leads to me…
		1.1.5 Footwear and insoles		"I have trouble finding comfortable shoes to wear"
	1.2 Dermatological	1.2.1 Skin health	Skin and nail health is reportedly deteriorating since the imposition of lock-down. People who rely on outside services were left unable to self-care. Some participants reported an increase in fungal skin and nail infection. A few participants noted signs consistent with bacterial infection and noted that they had recieved treatment for this.	"feet constantly peeling"; "Callused"; "plates of hard skin and corns"; "had ulcer under little toe of right foot which is normally checked via podarist"; "calluses,corns and hard skin are worse"; "bruising on big toes where pressure from smaller toe"; "get a lot of build up of callus under my metatarsals. This is usually removed every 6 weeks but, because of lockdown, is building up (in spite of…
		1.2.2 Nail care		"ingrowing toenail"; "sore 4th & 5th toes with thickened/split nails"; "unable to get foot care as unable to cut toe nail"; "Unable to cut my toenails or care for my feet because I suffer from rheumatoid arthritis and my hands are painful and distorted"; "splinter haemorages under big toe nails"
		1.2.3 Infection		"Athletes foot a constant battle"; "infected toenails - fungal - and verrucas"; "I have fungal toenail in 3 toes on my right foot and since lockdown it is now in my other foot"; "I have had some swelling and possibly infection…"; "a red hot and itchy rash"; "I had an infected blister. Which was treated with antibiotics. This didn’t resolve it so I had to have another round and then strangely I go…
	1.3 Pain	1.3.1 Pain	The majority of participants reported significantly disabling pain. In most cases, participants related their experience of pain to the progression of exsiting disease or illness.	"Pain in 1st MPT joint - hurts to apply pressure (almost like an internal bruise at times, but sometimes get a sharp pain depending on the way I walk/place my foot on the ground when sitting"; "The pain is very uncomfortable and feel like they're 'on fire'"; "Inside, deep pain, not superficial. Feels like boney pain"; "When on hard floor feel like I walking over stones"
Q2. Is your foot health affecting your ability to remain active currently? If yes, please describe	2.1 Physical restriction	2.1.1 Reduced distance	Participants reported a lot of physical restriction. Most noted a decline in their ability to walk, stand or complete any tasks of daily living, including engage in childcare. A number of participants noted not being able to undertake exercise that they would otherwise choose to do. Most notably, physcial restriction was always described as being a consequence of pain.	"Cannot walk any distance"
		2.1.2 Being slower		"It is slowing me down, doing 2 mile walk instead of 3 for instance"
		2.1.3 Limiting life's activities		"Limits distance I can walk, jobs I can do around the house"; "No longer jogging, and am only going for short walks"; "Have had to stop most exercises Pilates and yoga"; I struggle to stand for periods of time, e.g. doing household tasks, e.g. cooking, washing up, with walking and doing exercises, even when on the floor such as on all fours, sit-ups etc..."; "I do karate less than I would like"; …
		2.1.4 Moving/standing differently		"Struggle to balance, sometimes stumble on walking and try to over compensate"; "potter around"; "Affecting balance which affects other parts of my body"; "Struggling to get pace of walking back from Jan/Feb time"; "start to limp"; "Walking albeit in the garden is much slower"; "When on my feet I'm not standing properly"; "I used to go for longer walks and walk fast; now I can only hobble or walk…
	2.2 Pain	2.2.1 Pain	Pain was reported nearly all participants. Pain was nearly always associated with physical restriction and a loss of mobility/ability to do what they want to.	"It’s just like a knife at times so sore"; "Can’t walk without pain"; "feels like I’m walking on a marble and causes much pain"
		2.2.2 Tightness		"After 10 weeks shielding foot feels tighter and is aching much more"
		2.2.3 Weakness		"Sometimes ankles feel weak"
	2.3 Emotive responses	2.3.1 Fear	There is a sense of walking being 'harder' in terms of the motivation needed to get up and get going. Pain was frequently an associated factor. The restictions in place through COVID appear to have further reduced motivation to exercise or walk.	"Now I am reluctant to [walk]"; "Too frightened to walk on my own"; "More cautious about types of movement"; "I am therefore anxious this [stopping drug treatment] does not happen again"
		2.3.2 Less motivated		"I find I'm less motivated to go out for walks as not sure how much the pain may flare up and then I find it difficult and painful to walk home. If I do go out, I try to use the car or make sure it's short distances from home"; "Less inclined to go for a walk when painful; don't walk as far if it starts to hurt"; "I find I can’t run around after my children, everything feels a chore"; "Pain is ma…
		2.3.3 Feeling harder		"walking more difficult"; "I am finding it harder to stand and walk";"makes walking difficult"
	2.4 Consequences	2.4.1 Affected sleep	Pain and the related restriction in movement has led to secondary challenges, such as weight gain or work ability	"The pain causes… I am sleeping a lot in the day time but up in the night, sitting in my recliner chair for 1-2 hours, usually around 4am"; "Pain at night...can’t have covers over my feet. Pain means I’m tired as I don’t sleep"; "affecting my ability to get to sleep which adds to the chronic fatigue"
		2.4.2 Weight gain		"I have also put on weight through lack of exercise (and easy access to unsuitable food!) but feel the excess weight may have contributed to my foot problems"
		2.4.3 Footwear		"I was due for a fitting of new shoes as the shape of my feet had changed. However, the fitting appointment was cancelled due to covid. I am finding it more painful to manage with my old shoes"; "Problem wearing protective footwear"; "Shoes are rubbing on toes"; "So many pairs off shoes bought over the years since diagnosis all can only be worn limited time because off tendons and swelling"
		2.4.4 Work		"they are very painful to work on"
	2.5 Coping	2.5.1 Adjusting activities	There is a strong sense of stoicism across a number of participants. People seem able to find alternate ways of doing things, although for a number of participants a solution to reducing pain is to reduce activity levels.	"Having to consider sitting whilst gardening"; "Have to restrict runs"; "Despite being "shielded" I walked in early morning (5-6 am)"; "I cannot do anything after my daily walk, so have to walk as late in the day as possible"; "I've stopped running for time being"
		2.5.2 Stoicism		"I do try to walk even with the pain but the pain beats me in the end"; "I just put up with it"; "I push through the pain and limp if need be"
		2.5.3 Finding solutions in products		"Walking up and down stairs more difficult, although already was, and I have made enquiries about purchasing a stair lift as soon as I am free from having to shield"; "when it goes numb I have to raise it with a warm blanket or hot water bottle"; "I worn wound covers on my blisters to stop infection"; "Swelling makes skin more red and very dry. Difficult to keep feet clean as can’t reach them. Bo…
Q3. Are you doing anything at home to look after your feet currently (self-care)?	3.1 Skin and nail care	3.1.1 Skin care	A large number of participants reported regular attending to skin care with creams/moisturisers or filing and nail cutting/filing.	"A weekly regime of care, removing dead skin etc. Daily application of cream to keep skin hydrated"
		3.1.2 Nail care		"Trying to cut nails"
		3.1.3 Infection management		"I remove as much fungus as I can with a nail-file or small knife"; "Cream for athletes foot";
	3.2 Symptom management	3.2.1 Massage	A range of approaches to reduction of symptoms were reported. Massage, hot/cold therapy and rest/elevation were frequently cited examples. Some reference to the use of analgesia is made however this is infrequently mentioned. Attention to footwear and use of insoles is reported, with some people noting that they are using their footwear more inside the house during COVID restrictions. A range of …	"Massaging feet couple of times a day"
		3.2.2 Hot/Cold therapy		"Cold /hot compress"; "occasionally when it's bad will get a cold bottle from the freezer to roll under my feet"
		3.2.3 Rest &/or elevation		"Raising leg as often as possible (during working hours not so easy as sat at dining room table to work)"
		3.2.4 Pharmacological management		"I used ibuprofen gel and paracetamol as advised"
		3.2.5 Footwear & insoles		"Trying to wear supportive footwear, though heat & swelling doesn't make that comfortable to be able to do indoors (where I am mostly)"; " I wear shoes with orthotics instead of slippers in the house"
		3.2.6 Exercises		"Exercises - stretching my feet up & down before standing up, stretching feet & ankles by leaning towards a vertical surface"; "Trying to move them whilst seated, taking breaks to walk up and down the stairs at intervals"
	3.3 Support of others	3.3.1 Friends and family	There is acknowledgement that ability to physically self-care is limited and the support of friends or family has been vital during COVID. There is acknowledgement of missed appointments with HCPs.	"My husband (carer) makes pads"; "With my husband's help, I've been cutting and filing my nails and using an emery board on the hard skin"
		3.3.2 Healthcare professionals		"I used to see a podiatrist every 6 weeks"; "trying to manage without my chiropodist"
Q4. Is there any other feedback about looking after your foot health that you would like to share?

## Sheet: V2
Question	Theme	Sub theme	Code			Quotation	Analysis comment
Q1. What foot pain or problems do participants describe?	Foot pain as a constant companion during COVID-19	Adjusting & coping with pain	2.5.1 Adjusting activities	"Having to consider sitting whilst gardening"; "Have to restrict runs"; "Despite being "shielded" I walked in early morning (5-6 am)"; "I cannot do anything after my daily walk, so have to walk as late in the day as possible"; "I've stopped running for time being"
			2.4.4 Work	"they are very painful to work on"
			2.5.2 Stoicism	"I do try to walk even with the pain but the pain beats me in the end"; "I just put up with it"; "I push through the pain and limp if need be"
			2.5.3 Finding solutions in products	"Walking up and down stairs more difficult, although already was, and I have made enquiries about purchasing a stair lift as soon as I am free from having to shield"; "when it goes numb I have to raise it with a warm blanket or hot water bottle"; "I worn wound covers on my blisters to stop infection"; "Swelling makes skin more red and very dry. Difficult to keep feet clean as can’t reach them. Bo…
			3.2.1 Massage	"Massaging feet couple of times a day"
			3.2.2 Hot/Cold therapy	"Cold /hot compress"; "occasionally when it's bad will get a cold bottle from the freezer to roll under my feet"
			3.2.3 Rest &/or elevation	"Raising leg as often as possible (during working hours not so easy as sat at dining room table to work)"
			3.2.4 Pharmacological management	"I used ibuprofen gel and paracetamol as advised"
			3.2.5 Footwear & insoles	"Trying to wear supportive footwear, though heat & swelling doesn't make that comfortable to be able to do indoors (where I am mostly)"; " I wear shoes with orthotics instead of slippers in the house"
			3.2.6 Exercises	"Exercises - stretching my feet up & down before standing up, stretching feet & ankles by leaning towards a vertical surface"; "Trying to move them whilst seated, taking breaks to walk up and down the stairs at intervals"
		Pain is dominant	1.3.1 Pain	"Pain in 1st MPT joint - hurts to apply pressure (almost like an internal bruise at times, but sometimes get a sharp pain depending on the way I walk/place my foot on the ground when sitting"; "The pain is very uncomfortable and feel like they're 'on fire'"; "Inside, deep pain, not superficial. Feels like boney pain"; "When on hard floor feel like I walking over stones"
			1.1.1 Swelling	"My ankles are more swollen and painful than usual"
			1.1.2 Deformity	"I have deformed toes and feet"
			1.1.3 Injury	"plantarfasciitis"; "Achilles tendonitis"; "I have been diagnosed during lockdown with gout in my big toe and smaller toe affected now too"; "I have had foot pain for over a year caused by an injury (likely stress fracture/ligament damage) that causes aggravation to mid-foot during exercise/walking. Too much aggravation leads to me not being able to walk on that foot without limping. I have not b…
			2.4.3 Footwear	"I was due for a fitting of new shoes as the shape of my feet had changed. However, the fitting appointment was cancelled due to covid. I am finding it more painful to manage with my old shoes"; "Problem wearing protective footwear"; "Shoes are rubbing on toes"; "So many pairs off shoes bought over the years since diagnosis all can only be worn limited time because off tendons and swelling"
			2.3.1 Fear	"Now I am reluctant to [walk]"; "Too frightened to walk on my own"; "More cautious about types of movement"; "I am therefore anxious this [stopping drug treatment] does not happen again"
			2.3.2 Less motivated	"I find I'm less motivated to go out for walks as not sure how much the pain may flare up and then I find it difficult and painful to walk home. If I do go out, I try to use the car or make sure it's short distances from home"; "Less inclined to go for a walk when painful; don't walk as far if it starts to hurt"; "I find I can’t run around after my children, everything feels a chore"; "Pain is ma…
			2.3.3 Feeling harder	"walking more difficult"; "I am finding it harder to stand and walk";"makes walking difficult"
			2.4.1 Affected sleep	"The pain causes… I am sleeping a lot in the day time but up in the night, sitting in my recliner chair for 1-2 hours, usually around 4am"; "Pain at night...can’t have covers over my feet. Pain means I’m tired as I don’t sleep"; "affecting my ability to get to sleep which adds to the chronic fatigue"
			2.4.2 Weight gain	"I have also put on weight through lack of exercise (and easy access to unsuitable food!) but feel the excess weight may have contributed to my foot problems"
			2.1.3 Limiting life's activities	"Limits distance I can walk, jobs I can do around the house"; "No longer jogging, and am only going for short walks"; "Have had to stop most exercises Pilates and yoga"; I struggle to stand for periods of time, e.g. doing household tasks, e.g. cooking, washing up, with walking and doing exercises, even when on the floor such as on all fours, sit-ups etc..."; "I do karate less than I would like"; …
Q2. Is your foot health affecting your ability to remain active currently? If yes, please describe	Pain impacted PA & QoL	not being able to take part in the COVID lockdown daily exercise	2.1.3 Limiting life's activities	"Limits distance I can walk, jobs I can do around the house"; "No longer jogging, and am only going for short walks"; "Have had to stop most exercises Pilates and yoga"; I struggle to stand for periods of time, e.g. doing household tasks, e.g. cooking, washing up, with walking and doing exercises, even when on the floor such as on all fours, sit-ups etc..."; "I do karate less than I would like"; …
			1.1.4 Physical activity	"tends to be difficult to walk on it after resting, despite tendon stretching exercises"; "Reduced exercise has caused extra pain"; "an old karate accident, but it is hurting more often now I am doing karate more often"; "I have developed a pain in my ankle and heal which limits my ability to walk comfortably since late April. Worse after a period of inactivity"; "Too much aggravation leads to me…
			2.1.1 Reduced distance	"Cannot walk any distance"
			2.1.2 Being slower	"It is slowing me down, doing 2 mile walk instead of 3 for instance"
			2.1.4 Moving/standing differently	"Struggle to balance, sometimes stumble on walking and try to over compensate"; "potter around"; "Affecting balance which affects other parts of my body"; "Struggling to get pace of walking back from Jan/Feb time"; "start to limp"; "Walking albeit in the garden is much slower"; "When on my feet I'm not standing properly"; "I used to go for longer walks and walk fast; now I can only hobble or walk…
			2.2.1 Pain	"It’s just like a knife at times so sore"; "Can’t walk without pain"; "feels like I’m walking on a marble and causes much pain"
			2.2.2 Tightness	"After 10 weeks shielding foot feels tighter and is aching much more"
			2.2.3 Weakness	"Sometimes ankles feel weak"
			2.3.1 Fear	"Now I am reluctant to [walk]"; "Too frightened to walk on my own"; "More cautious about types of movement"; "I am therefore anxious this [stopping drug treatment] does not happen again"
			2.3.2 Less motivated	"I find I'm less motivated to go out for walks as not sure how much the pain may flare up and then I find it difficult and painful to walk home. If I do go out, I try to use the car or make sure it's short distances from home"; "Less inclined to go for a walk when painful; don't walk as far if it starts to hurt"; "I find I can’t run around after my children, everything feels a chore"; "Pain is ma…
			2.3.3 Feeling harder	"walking more difficult"; "I am finding it harder to stand and walk";"makes walking difficult"
		pain limits QoL
Q3 other	COVID sharpens focus on short term self-care needs	Lockdown short term self care	3.1.1 Skin care	"A weekly regime of care, removing dead skin etc. Daily application of cream to keep skin hydrated"
			3.1.2 Nail care	"Trying to cut nails"
			2.5.3 Finding solutions in products	"Walking up and down stairs more difficult, although already was, and I have made enquiries about purchasing a stair lift as soon as I am free from having to shield"; "when it goes numb I have to raise it with a warm blanket or hot water bottle"; "I worn wound covers on my blisters to stop infection"; "Swelling makes skin more red and very dry. Difficult to keep feet clean as can’t reach them. Bo…
			3.1.3 Infection management	"I remove as much fungus as I can with a nail-file or small knife"; "Cream for athletes foot";
			3.2.1 Massage	"Massaging feet couple of times a day"
			3.2.2 Hot/Cold therapy	"Cold /hot compress"; "occasionally when it's bad will get a cold bottle from the freezer to roll under my feet"
			3.2.3 Rest &/or elevation	"Raising leg as often as possible (during working hours not so easy as sat at dining room table to work)"
			3.2.4 Pharmacological management	"I used ibuprofen gel and paracetamol as advised"
			3.2.5 Footwear & insoles	"Trying to wear supportive footwear, though heat & swelling doesn't make that comfortable to be able to do indoors (where I am mostly)"; " I wear shoes with orthotics instead of slippers in the house"
			3.2.6 Exercises	"Exercises - stretching my feet up & down before standing up, stretching feet & ankles by leaning towards a vertical surface"; "Trying to move them whilst seated, taking breaks to walk up and down the stairs at intervals"
			1.2.1 Skin health	"feet constantly peeling"; "Callused"; "plates of hard skin and corns"; "had ulcer under little toe of right foot which is normally checked via podarist"; "calluses,corns and hard skin are worse"; "bruising on big toes where pressure from smaller toe"; "get a lot of build up of callus under my metatarsals. This is usually removed every 6 weeks but, because of lockdown, is building up (in spite of…
			1.2.2 Nail care	"ingrowing toenail"; "sore 4th & 5th toes with thickened/split nails"; "unable to get foot care as unable to cut toe nail"; "Unable to cut my toenails or care for my feet because I suffer from rheumatoid arthritis and my hands are painful and distorted"; "splinter haemorages under big toe nails"
			1.2.3 Infection	"Athletes foot a constant battle"; "infected toenails - fungal - and verrucas"; "I have fungal toenail in 3 toes on my right foot and since lockdown it is now in my other foot"; "I have had some swelling and possibly infection…"; "a red hot and itchy rash"; "I had an infected blister. Which was treated with antibiotics. This didn’t resolve it so I had to have another round and then strangely I go…
		Support networks are vital during lockdown	3.3.1 Friends and family	"My husband (carer) makes pads"; "With my husband's help, I've been cutting and filing my nails and using an emery board on the hard skin"
			2.4.3 Footwear	"I was due for a fitting of new shoes as the shape of my feet had changed. However, the fitting appointment was cancelled due to covid. I am finding it more painful to manage with my old shoes"; "Problem wearing protective footwear"; "Shoes are rubbing on toes"; "So many pairs off shoes bought over the years since diagnosis all can only be worn limited time because off tendons and swelling"
			3.3.2 Healthcare professionals	"I used to see a podiatrist every 6 weeks"; "trying to manage without my chiropodist"
	Post-COVID reliance on HCPs to support lon term health goals

## Sheet: V3
	COVID-19 lockdown disrupts support networks integral to maintaining foot health: a mixed-methods study
	Cherry, Gates, Culliford, Walker-Bone, Portillo
	Qualitative themes, sub-themes & codes
	Theme	Sub theme	Code			Quotation
	1. Foot pain as a constant companion during COVID-19	1.1 emotive and physically representative manifestations of foot pain	1.1.1 Pain	"Pain in 1st MPT joint - hurts to apply pressure (almost like an internal bruise at times, but sometimes get a sharp pain depending on the way I walk/place my foot on the ground when sitting"; "The pain is very uncomfortable and feel like they're 'on fire'"; "Inside, deep pain, not superficial. Feels like boney pain"; "When on hard floor feel like I walking over stones"
			1.1.2 Swelling	"My ankles are more swollen and painful than usual"
			1.1.3 Deformity	"I have deformed toes and feet"
			1.1.4 Injury	"plantarfasciitis"; "Achilles tendonitis"; "I have been diagnosed during lockdown with gout in my big toe and smaller toe affected now too"; "I have had foot pain for over a year caused by an injury (likely stress fracture/ligament damage) that causes aggravation to mid-foot during exercise/walking. Too much aggravation leads to me not being able to walk on that foot without limping. I have not b…
			1.1.5 Footwear	"I was due for a fitting of new shoes as the shape of my feet had changed. However, the fitting appointment was cancelled due to covid. I am finding it more painful to manage with my old shoes"; "Problem wearing protective footwear"; "Shoes are rubbing on toes"; "So many pairs off shoes bought over the years since diagnosis all can only be worn limited time because off tendons and swelling"
		1.2 Negative consequences associated with persistent pain	1.2.1 Fear	"Now I am reluctant to [walk]"; "Too frightened to walk on my own"; "More cautious about types of movement"; "I am therefore anxious this [stopping drug treatment] does not happen again"
			1.2.2 Less motivated	"I find I'm less motivated to go out for walks as not sure how much the pain may flare up and then I find it difficult and painful to walk home. If I do go out, I try to use the car or make sure it's short distances from home"; "Less inclined to go for a walk when painful; don't walk as far if it starts to hurt"; "I find I can’t run around after my children, everything feels a chore"; "Pain is ma…
			1.2.3 Feeling harder	"walking more difficult"; "I am finding it harder to stand and walk";"makes walking difficult"
			1.2.4 Affected sleep	"The pain causes… I am sleeping a lot in the day time but up in the night, sitting in my recliner chair for 1-2 hours, usually around 4am"; "Pain at night...can’t have covers over my feet. Pain means I’m tired as I don’t sleep"; "affecting my ability to get to sleep which adds to the chronic fatigue"
			1.2.5 Weight gain	"I have also put on weight through lack of exercise (and easy access to unsuitable food!) but feel the excess weight may have contributed to my foot pain"
			1.2.6 Limiting life's activities	"Limits distance I can walk, jobs I can do around the house"; "No longer jogging, and am only going for short walks"; "Have had to stop most exercises Pilates and yoga"; I struggle to stand for periods of time, e.g. doing household tasks, e.g. cooking, washing up, with walking and doing exercises, even when on the floor such as on all fours, sit-ups etc..."; "I do karate less than I would like"; …
	2. Self-care continues during lockdown but does not sufficiently prevent detriorating foot health	2.1 Effective lockdown self care	2.1.1 Skin care	"A weekly regime of care, removing dead skin etc. Daily application of cream to keep skin hydrated"
			2.1.2 Nail care	"Trying to cut nails"
			2.1.3 Finding solutions in products	"Walking up and down stairs more difficult, although already was, and I have made enquiries about purchasing a stair lift as soon as I am free from having to shield"; "when it goes numb I have to raise it with a warm blanket or hot water bottle"; "I worn wound covers on my blisters to stop infection"; "Swelling makes skin more red and very dry. Difficult to keep feet clean as can’t reach them. Bo…
			2.1.4 Infection management	"I remove as much fungus as I can with a nail-file or small knife"; "Cream for athletes foot";
			2.1.5 Massage	"Massaging feet couple of times a day"
			2.1.6 Hot/Cold therapy	"Cold /hot compress"; "occasionally when it's bad will get a cold bottle from the freezer to roll under my feet"
			2.1.7 Rest &/or elevation	"Raising leg as often as possible (during working hours not so easy as sat at dining room table to work)"
			2.1.8 Pharmacological management	"I used ibuprofen gel and paracetamol as advised"
			2.1.9 Exercises	"Exercises - stretching my feet up & down before standing up, stretching feet & ankles by leaning towards a vertical surface"; "Trying to move them whilst seated, taking breaks to walk up and down the stairs at intervals"
		2.2 Ineffective lockdown self-care	2.2.1 Footwear & insoles	"Trying to wear supportive footwear, though heat & swelling doesn't make that comfortable to be able to do indoors (where I am mostly)"; " I wear shoes with orthotics instead of slippers in the house"
			2.2.2 Skin health	"feet constantly peeling"; "Callused"; "plates of hard skin and corns"; "had ulcer under little toe of right foot which is normally checked via podarist"; "calluses,corns and hard skin are worse"; "bruising on big toes where pressure from smaller toe is getting worse"; "get a lot of build up of callus under my metatarsals. This is usually removed every 6 weeks but, because of lockdown, is buildin…
			2.2.3 Nail care	"ingrowing toenail"; "sore 4th & 5th toes with thickened/split nails"; "unable to get foot care as unable to cut toe nail"; "Unable to cut my toenails or care for my feet because I suffer from rheumatoid arthritis and my hands are painful and distorted"; "splinter haemorages under big toe nails"
			2.2.4 Infection	"Athletes foot a constant battle"; "infected toenails - fungal - and verrucas"; "I have fungal toenail in 3 toes on my right foot and since lockdown it is now in my other foot"; "I have had some swelling and possibly infection…"; "a red hot and itchy rash"; "I had an infected blister. Which was treated with antibiotics. This didn’t resolve it so I had to have another round and then strangely I go…
	3. Lockdown forces the emergence of a cope of crumble scenario	3.1 Findings solutions to resolve or limit foot problems	3.1.1 Finding solutions in products	"Walking up and down stairs more difficult, although already was, and I have made enquiries about purchasing a stair lift as soon as I am free from having to shield"; "when it goes numb I have to raise it with a warm blanket or hot water bottle"; "I worn wound covers on my blisters to stop infection"; "Swelling makes skin more red and very dry. Difficult to keep feet clean as can’t reach them. Bo…
			3.1.2 Massage	"Massaging feet couple of times a day"
			3.1.3 Hot/Cold therapy	"Cold /hot compress"; "occasionally when it's bad will get a cold bottle from the freezer to roll under my feet"
			3.1.4 Rest &/or elevation	"Raising leg as often as possible (during working hours not so easy as sat at dining room table to work)"
			3.1.5 Pharmacological management	"I used ibuprofen gel and paracetamol as advised"
			3.1.6 Footwear & insoles	"Trying to wear supportive footwear, though heat & swelling doesn't make that comfortable to be able to do indoors (where I am mostly)"; " I wear shoes with orthotics instead of slippers in the house"
			3.1.7 Exercises	"Exercises - stretching my feet up & down before standing up, stretching feet & ankles by leaning towards a vertical surface"; "Trying to move them whilst seated, taking breaks to walk up and down the stairs at intervals"
		3.2 Adjusting to live with foot problems	3.2.1 Adjusting activities	"Having to consider sitting whilst gardening"; "Have to restrict runs"; "Despite being "shielded" I walked in early morning (5-6 am)"; "I cannot do anything after my daily walk, so have to walk as late in the day as possible"; "I've stopped running for time being"
			3.2.2 Work	"they are very painful to work on"
			3.2.3 Stoicism	"I do try to walk even with the pain but the pain beats me in the end"; "I just put up with it"; "I push through the pain and limp if need be"
		3.3 Expressions of inability to cope with foot problems	3.3.1 Expressions of inability to cope
	4. Lockdown does not change future intent to access health professional support	4.1 Informal/ social support networks	4.1.1 Friends and family	"My husband (carer) makes pads"; "With my husband's help, I've been cutting and filing my nails and using an emery board on the hard skin"
		4.2 Formal/ health professional support networks	4.2.1 Healthcare professionals	"I used to see a podiatrist every 6 weeks"; "trying to manage without my chiropodist"
			4.2.2 Footwear	"I was due for a fitting of new shoes as the shape of my feet had changed. However, the fitting appointment was cancelled due to covid. I am finding it more painful to manage with my old shoes"; "Problem wearing protective footwear"; "Shoes are rubbing on toes"; "So many pairs off shoes bought over the years since diagnosis all can only be worn limited time because off tendons and swelling"
	5. Poor foot health limits peoples ability to participate in recommended physical activity	5.1 Physical restrictions	5.1.1 Limiting life's activities	"Limits distance I can walk, jobs I can do around the house"; "No longer jogging, and am only going for short walks"; "Have had to stop most exercises Pilates and yoga"; I struggle to stand for periods of time, e.g. doing household tasks, e.g. cooking, washing up, with walking and doing exercises, even when on the floor such as on all fours, sit-ups etc..."; "I do karate less than I would like"; …
			5.1.2 Physical activity	"tends to be difficult to walk on it after resting, despite tendon stretching exercises"; "Reduced exercise has caused extra pain"; "an old karate accident, but it is hurting more often now I am doing karate more often"; "I have developed a pain in my ankle and heal which limits my ability to walk comfortably since late April. Worse after a period of inactivity"; "Too much aggravation leads to me…
			5.1.3 Reduced distance	"Cannot walk any distance"
			5.1.4 Being slower	"It is slowing me down, doing 2 mile walk instead of 3 for instance"
			5.1.5 Moving/standing differently	"Struggle to balance, sometimes stumble on walking and try to over compensate"; "potter around"; "Affecting balance which affects other parts of my body"; "Struggling to get pace of walking back from Jan/Feb time"; "start to limp"; "Walking albeit in the garden is much slower"; "When on my feet I'm not standing properly"; "I used to go for longer walks and walk fast; now I can only hobble or walk…
			5.1.6 Pain	"It’s just like a knife at times so sore"; "Can’t walk without pain"; "feels like I’m walking on a marble and causes much pain"
			5.1.7 Tightness	"After 10 weeks shielding foot feels tighter and is aching much more"
			5.1.8 Weakness	"Sometimes ankles feel weak"
		5.2 Emotive restrictions	5.2.1 Fear	"Now I am reluctant to [walk]"; "Too frightened to walk on my own"; "More cautious about types of movement"; "I am therefore anxious this [stopping drug treatment] does not happen again"
			5.2.2 Less motivated	"I find I'm less motivated to go out for walks as not sure how much the pain may flare up and then I find it difficult and painful to walk home. If I do go out, I try to use the car or make sure it's short distances from home"; "Less inclined to go for a walk when painful; don't walk as far if it starts to hurt"; "I find I can’t run around after my children, everything feels a chore"; "Pain is ma…
			5.2.3 Feeling harder	"walking more difficult"; "I am finding it harder to stand and walk";"makes walking difficult"
